# Supplementary material for: Integrative network analysis highlights biological processes underlying GLP-1 stimulated insulin secretion: A DIRECT study
Source: PLoS One. 2018 Jan 2;13(1):e0189886. doi: 10.1371/journal.pone.0189886 (PMC5749727; doi:10.1371/journal.pone.0189886)
Supplement: S8 Table — The overlap P-value calls likely upstream regulators based on significant overlap between dataset genes and known targets regulated by a transcriptional regulator. The z-score algorithm is designed to produce either a prediction of activation or inhibition (or no prediction). The analysis examines the known targets of each upstream regulator in the dataset, compares the targets’ actual direction of change to expectations derived from the literature, then issues a prediction for each upstream regulator. The direction of change is the gene expression in the experimental samples relative to a control. If the direction of change is consistent with the literature across most targets, IPA predicts that the upstream regulator is more active in the experimental sample than in the control. Mostly inconsistent with the literature (anti-correlated with the literature), IPA predicts that the upstream regulator is less active in the experimental sample than in the control. If there is a random pattern relative to the literature, IPA does not make an activation or inhibition prediction for the upstream regulator. However, in these case, there may still be a significant overlap (Fisher’s Exact P-value), just no clear pattern to predict a direction of activation. Genes highlighted in yellow were also present in the human beta-cell GLP-1 response consensus network. (XLSX) [file pone.0189886.s018.xlsx]

## Sheet: ST8
Upstream Regulator	Exp Fold Change	Molecule Type	Predicted Activation State	Activation z-score	P-value of overlap	Target molecules in dataset
CTNNB1	1	transcription regulator		0.896	0.000205	ALDH1A1,ALDH1A3,BMP1,CTGF,CTHRC1,CTNNA1,CYB5A,CYP2E1,DPEP1,EHD1,EMX2,EYA2,F13A1,GAP43,ITSN1,LAMB1,MMP14,MMP2,MMP3,MYL4,SEC61A1,SOX4
CD44	1.3	enzyme	Activated	2.333	0.000212	COL3A1,COL5A2,GADD45A,LAMB1,LDB1,Ly6a (includes others),MMP14,MMP2,MMP3,THY1
PI3K (complex)		complex		1.403	0.0167	ADAM12,CD86,CTGF,GAP43,GSTM5,HIF1A,MMP14,MMP2,POSTN
FOXO1	-1	transcription regulator		-1.054	0.02	ALDOB,CDC42EP3,CITED2,CTGF,GADD45A,HPD,MMP3,NOV,OVOL1,TRIB3
ITGB1	-1.1	transmembrane receptor			0.0314	COL1A2,LAMA1,LAMB1,MMP2
COL4A3	1.1	other			2.75e-08	COL1A2,COL3A1,CTGF,LAMA1,LAMB1,MMP14,MMP2
TGFB1	1.2	growth factor	Activated	2.249	6.38e-09	AASS,ACPP,ADAM12,ADAMTS12,ADAMTS2,ADM,ANXA8/ANXA8L1,BMP1,CALML3,CD163,CD86,CDC42EP3,CITED2,COL1A2,COL3A1,COL6A3,COMP,CPXM1,CSPG4,CTGF,CTSC,DPYSL3,EDNRB,EXT1,F13A1,FBN1,FNDC5,FURIN,GADD45A,HIF1A,IFI16,IFRD1,LDB1,Ly6a (includes others),MFAP2,MMP14,MMP2,MMP3,MYD88,MYO1C,NIPA2,NOV,OVOL1,P2RY14,PCGF2,PLA1A,PLOD2,POSTN,SLC39A1,SOX4,SPRY1,SYP,THY1
FBN1	1.8	other		-1.561	9.59e-09	COL1A2,COL3A1,COL6A3,CTGF,FBN1,MMP2,MMP3
IL10RA	1.3	transmembrane receptor		0.804	1.45e-08	ALDOB,CLIC6,COL14A1,DPEP1,DPT,EDNRB,F13A1,FBN1,FSTL1,GSTM5,Gstm6,IFI16,LUM,Ly6a (includes others),NOV,PCOLCE,POSTN,TMEM30B,TNFSF15,TTR
HRAS	-1.1	enzyme		-0.344	1.29e-07	ADM,ALDH1A3,BMP1,COL1A2,COL3A1,COL5A2,CTGF,CTSC,CYP1A1,EIF4G3,FSTL1,FURIN,HIF1A,LRRC17,MMP14,MMP2,MMP3,MYO1C,NRAP,PLOD2,PLTP,POSTN,PTGFRN,SOX4,SSR3,TINAGL1
dexamethasone		chemical drug		-1.43	1.46e-07	ADAM12,ADAMTS15,ADAMTS2,ADM,AKR1C3,ALDH1A1,ALDOB,APOA4,BMP1,CD163,CD86,CDC42EP3,CES1,CTGF,CXCL14,CYP1A1,CYP2E1,DHCR24,EDNRB,EIF1AX,EYA2,FCGR2B,FURIN,GADD45A,GAP43,GSTM5,HPD,HSD11B1,IFRD1,IL1RL2,LAMA1,Ly6a (includes others),MGAM,MMP14,MMP2,MMP3,NOV,NREP,PLOD2,POSTN,PTGFRN,SCARB2,SCG2,SEC61A1,SPRY1,TIMP4,Trim30a/Trim30d,TTR,UCP2
ALDH1A2	-1.1	enzyme		-0.87	1.92e-07	ALDH1A1,ALDH1A3,COL1A2,COL3A1,CTGF,Ly6a (includes others),PCOLCE
TP53	1	transcription regulator		0.354	8.56e-07	ANXA8/ANXA8L1,ARHGAP1,BMP1,CDC42EP3,CITED2,COL14A1,COL1A2,COL3A1,COL5A2,CTGF,CYB5A,CYP1A1,DHCR24,DHCR7,DPEP1,EIF4G3,FSTL1,GADD45A,GSTM5,HIF1A,IFI16,Irs3,LRRC17,Ly6a (includes others),MAP3K4,MFAP2,MMP2,MMP3,MYL4,MYO1C,NRAP,OSGIN1,PEG10,PLOD2,PLTP,POSTN,SEC61A1,SLC16A1,STEAP3,THY1,TINAGL1,TRIB3,UIMC1
AGT	-1.1	growth factor	Activated	2.306	8.75e-07	ADAM12,ADM,CD86,COL1A2,COL3A1,CTGF,CYP2E1,EBP,EDNRB,GAP43,GSTA3,GSTM5,Gstm6,HIF1A,LAMB1,MMP2,NREP,POSTN,SOX4,UCP2,WNK4
BIRC5	1.2	other			9.17e-07	COL3A1,COL5A2,CTGF,DPT,FBN1,FCGR2B,LUM,MMP2
Alpha catenin		group	Inhibited	-3.255	9.23e-07	ADAMTS12,ADAMTS2,COL1A2,COL3A1,COL5A2,COL6A3,FSTL1,GAP43,LUM,MMP2,NOV
RETNLB	1	other		1.667	1.27e-06	BMP1,CD86,COL1A2,CTGF,LAMA1,MMP2,PLA1A,PLA2G15,TINAGL1
ramipril		chemical drug		-1.633	1.29e-06	COL1A2,COL3A1,CTGF,LAMA1,LAMB1,MMP2
thioacetamide		chemical toxicant	Activated	2.578	2.28e-06	AKR1C3,COL1A2,COL3A1,CTGF,CYP1A1,EDNRB,FBN1,FSTL1,GTPBP4,MMP14,MMP2,PCOLCE,PLA1A,PTGFRN,STEAP3
TERT	-1.1	enzyme			2.39e-06	ALDH1A3,COL5A2,CTGF,CTSC,IFI16,MMP14,MMP2,MMP3,PLOD2,PLTP,SSR3
bleomycin		chemical drug		1.56	2.58e-06	BMP1,CD86,COL1A2,COL3A1,CTGF,LAMA1,MMP14,MMP2,PLA1A,PLA2G15,TIMP4,TINAGL1
halofuginone		chemical drug		-1.039	3.71e-06	COL1A2,CTGF,CTHRC1,EDNRB,FBN1,FSTL1,MMP2,MMP3,PCOLCE,PTGFRN,STEAP3
CR1L	1	other		-1.353	4.74e-06	COL1A2,COL3A1,COL6A3,CTGF,FBN1,LUM
MYC	-1	transcription regulator		-0.274	6.21e-06	ADM,BMPER,CAST,CD86,COL14A1,COL1A2,COL3A1,COL5A2,COL6A3,CSDE1,CSPG4,CTNNA1,DLX3,EMX2,FBN1,FSTL1,GADD45A,HIF1A,IFI16,LUM,Ly6a (includes others),MAPKAPK5,MYO1C,NF2,OVOL1,PEG10,PIAS3,PLA1A,RARRES1,SEPHS2,SLC16A1,THY1,WNT8B
genistein		chemical drug		0.962	1.2e-05	ACPP,ADM,AKR1C3,ARSG,BDKRB1,CD86,CITED2,CTGF,CYP1A1,EXT1,FCGR2B,HIF1A,MMP2,MMP3,PFKFB4,PLA2G15,PLTP,SCARB2
CEBPB	-1.1	transcription regulator		-0.961	1.24e-05	AKR1C3,ALDH1A1,CDC42EP3,COL1A2,COL5A2,CTSC,CYB5A,CYP1A1,CYP2E1,DHCR7,DLX3,GADD45A,HSD11B1,INMT,MMP3,Orm1 (includes others),TIMP4,TRIB3
ERBB2	-1.1	kinase	Activated	2.173	1.27e-05	ADAM12,ADAMTS16,BMP1,CES1,COL3A1,COL5A2,COL6A3,CTGF,CUL3,DPEP1,DPT,EBP,FSTL1,HIF1A,LAMB1,LUM,MFAP2,MMP14,MMP3,NPTX2,SEC61A1,SOX4,SRPX,THY1
NFE2L2	1.1	transcription regulator		-1.406	1.29e-05	APOA4,CD86,COL3A1,CTGF,DHCR7,GSTA3,GSTM4,GSTM5,Gstm6,HACD3,IFRD1,INMT,KIFC2,OSGIN1,SCG2,SEC61A1,SYP,TTR
IL4	1.1	cytokine		0.462	1.37e-05	CD163,CD86,CITED2,Cmah,COL1A2,COL6A3,CTGF,CTNNA1,CTSC,CYP2E1,EXT1,F13A1,FCGR2B,HSD11B1,IFI16,IL1RL2,MMP2,MMP3,MOV10,PDE1B,PLOD2,POSTN,PROS1,THY1,TINAGL1,Trim30a/Trim30d,VIPR2
GATA4	-1	transcription regulator		-1.004	1.54e-05	COL1A2,COL3A1,CTGF,CTHRC1,DLX3,EMX2,IFI16,MYL4,NF2,OVOL1,POSTN
HTT	1.1	transcription regulator		1.673	1.86e-05	ADAMTS2,BMP1,CAMK2A,CAST,CITED2,CLIC6,COL6A3,DHCR7,DLX3,EDNRB,ESRRB,GAP43,GNAL,HIF1A,IFI16,MMP14,MMP2,MMP3,MYL4,NREP,PDE1B,RASGRP2,SPTAN1,SYP,VIPR2
ID1	-1.2	transcription regulator		0.922	2e-05	ALDH1A1,CTGF,IFI16,Ly6a (includes others),MMP14,MMP2,PCGF2
FOXO4	-1.2	transcription regulator	Inhibited	-2.2	2.8e-05	CDC42EP3,CTGF,DHCR24,GADD45A,HIF1A,OVOL1
AR	-1.2	ligand-dependent nuclear receptor		0.093	2.91e-05	4930486L24Rik,ACPP,ADM,AKR1C3,ALDH1A1,CAMK2A,CAST,COL3A1,DHCR24,DHCR7,EBP,EDNRB,EMB,Ly6a (includes others),PIAS3,PLOD2,PROS1,RARRES1
methylmercury		chemical toxicant		-0.378	3.75e-05	ATF5,CITED2,COL3A1,CYP1A1,CYP2E1,DHCR24,SLC16A1
POR	-1.1	enzyme			5.11e-05	ALDH1A1,APOA4,ATF5,CYP1A1,DHCR24,DHCR7,GSTA3,GSTM5,Gstm6,HIF1A,TMEM184C
lipopolysaccharide		chemical drug	Activated	2.673	5.31e-05	ADM,ARHGAP1,BDKRB1,CD163,CD86,CDC42EP3,COL1A2,COL3A1,COL5A2,CSPG4,CTGF,CTSC,CXCL14,CYB5A,CYP1A1,CYP2E1,DHCR24,EHD1,EMB,FBN1,FCGR2B,FURIN,GADD45A,GAP43,HIF1A,IFI16,IFRD1,LAMB1,Ly6a (includes others),MMP14,MMP2,MMP3,MYD88,Orm1 (includes others),PCOLCE,RNASE2,SYP,THY1,TIMP4,TNFSF15,Trim30a/Trim30d,UCP2,VIPR2
SMAD7	-1.1	transcription regulator		-1.614	5.93e-05	ADAMTS2,CITED2,COL1A2,COL3A1,COL6A3,CTGF,FURIN,GADD45A,MMP2
allyl sulfide		chemical drug		-0.865	5.97e-05	COL1A2,CYP2E1,GSTA3,GSTM5
progesterone		chemical - endogenous mammalian		-0.496	6.64e-05	ACPP,ADM,AKR1C3,ALDH1A1,CD86,CES1,CITED2,CYP1A1,CYP2E1,GAP43,GSTA3,HIF1A,HSD11B1,INMT,MMP2,MMP3,MYD88,POSTN,PROS1,SYP,TTR
ITGB6	-1.1	other		1.671	7.72e-05	COL1A2,COL3A1,MMP2,MMP3
DCN	1	other		-1.464	8.43e-05	COL1A2,CTGF,FBN1,HIF1A,MMP2,TCHP
salirasib		chemical drug		-0.896	8.43e-05	ADM,CITED2,COL5A2,HIF1A,PFKFB4,PLOD2
IL13	1.1	cytokine		1.142	9.01e-05	CD163,CD86,COL1A2,COL3A1,CTGF,CTSC,DHCR24,F13A1,FCGR2B,HSD11B1,MMP14,MMP2,MMP3,POSTN,SLC7A7,TIMP4
OCLN	-1	enzyme			9.08e-05	MMP14,MMP2,MMP3
TNF	1	cytokine	Activated	2.132	9.5e-05	A4GALT,ADM,ALDH1A3,ARSI,BDKRB1,BMPER,CD163,CD86,CITED2,COL1A2,COL3A1,CRY1,CTGF,CTSC,CYP1A1,CYP2E1,DENND2D,EDNRB,EHD1,EXT1,FCGR2B,GADD45A,GFRA2,HIF1A,HSD11B1,IFI16,MMP14,MMP2,MMP3,MYD88,NOV,PLOD2,POSTN,PPP2R1B,RGS3,RNASE2,SOX4,THY1,TIMP4,TNFSF15,UCP2,VIPR2
INHA	1	growth factor		-1.97	0.0001	COL1A2,COL3A1,COMP,CTGF,Cyp2d22,ITGA9,KRT79,MMP2
PRDM5	1	transcription regulator			0.000119	ALX4,ARID3B,MYD88,NREP,OVOL1,PIAS3,TINAGL1
AKT1	1	kinase	Activated	2.36	0.000131	CD86,DHCR7,DLX3,EBP,FSTL1,GSTM5,HIF1A,LAMA1,LAMB1,MMP14,MMP2,PCOLCE
IGF2BP1	-1.3	translation regulator	Activated	2	0.000152	COL14A1,COL1A2,COL6A3,LUM
benzene		chemical toxicant		-1.633	0.000156	ATF5,CITED2,COL3A1,CYP2E1,DHCR24,SLC16A1
trichloroethylene		chemical toxicant		-1.633	0.000156	ATF5,CITED2,COL3A1,CYP2E1,DHCR24,SLC16A1
PDGF BB		complex		0.999	0.000169	ADM,BDKRB1,COL3A1,CTGF,EDNRB,GADD45A,MMP14,MMP2,MMP3,PCGF2,PCOLCE,POSTN,SLC7A7,TRIB3
tretinoin		chemical - endogenous mammalian		-0.106	0.000177	ADM,ALDH1A1,ALDH1A3,ANXA8/ANXA8L1,ARHGAP1,CALML3,CD86,CES1,CITED2,COL1A2,COL3A1,CTGF,CTSC,CYP1A1,DDX60,DPYSL3,EHD1,EYA2,GAP43,HSD11B1,IFI16,INMT,LAMB1,Ly6a (includes others),MMP14,MMP3,MYO1C,NOV,PDE1B,PEG10,PLA2G15,POSTN,RARRES1,RTP4,SLC16A1,SOX4,UCP2
KLF2	-1	transcription regulator		-0.149	0.000179	ADM,CTGF,GADD45A,HIF1A,MMP14,PLOD2,PROS1,RGS3,RNASE2
RET	1.1	kinase		1	0.00018	COL1A2,EDNRB,EIF4G3,MMP14,MMP3,NOV,PLOD2,SCARA3
SBDS	-1.2	other			0.000189	AKR1C3,COL14A1,CTGF,GAP43,IFI16,MYD88,TRIB3
adalimumab		biologic drug			0.000195	CD86,FCGR2B
HMGA1	1.2	transcription regulator		-1	0.000209	COL1A2,CTSC,DHCR7,FSTL1,LAMA1,LAMB1,Ly6a (includes others),NF2,SOX4
TAC4		other			0.000213	MMP14,MMP2,TNFSF15
HNF1B	1	transcription regulator		-1.633	0.000216	ALDOB,CITED2,COL5A2,EXT1,LAMB1,LUM,MMP2,TTR
SEMA7A	-1	transmembrane receptor		1	0.000224	COL1A2,COL3A1,CTGF,NOV
FGFR2	1.1	kinase		1.616	0.000229	BMPER,CLIC6,CTSC,LAMA1,LAMB1,NNAT,PCOLCE,TTR
SOX7	-1.1	transcription regulator		0	0.000256	DLX3,EMX2,NF2,OVOL1,SOX4
CEBPA	-1.1	transcription regulator		-0.528	0.000261	AKR1C3,APOA4,COL1A2,CTNNA1,DHCR7,DLX3,EMX2,FXR2,GADD45A,HSD11B1,Ly6a (includes others),NF2,Orm1 (includes others),OVOL1,PLOD2,TIMP4
MMP7	-1	peptidase			0.000302	ADAM12,MMP2,MMP3
wortmannin		chemical - kinase inhibitor		-1.863	0.000329	COL1A2,COL3A1,CTGF,CYP2E1,EIF1AX,GAP43,HIF1A,MMP14,MMP2,POSTN
FMR1	1	other		1.264	0.000399	CAMK2A,EIF1AX,FXR2,GAP43,SYP
PAX1	-1.1	transcription regulator		-0.447	0.000443	DLX3,EMX2,NF2,OVOL1,THY1
SOX2	-1.2	transcription regulator		-0.572	0.000455	ALDH1A1,BMPER,CITED2,CTGF,CXCL14,DLX3,EMX2,ESRRB,HHAT,MYD88,NF2,OVOL1,WNT8B
REN	1.1	peptidase		0.849	0.00051	CD86,COL3A1,CTGF,CYP2E1
VGLL3	-1.1	other			0.000542	ADM,COL1A2,MMP3
methylprednisolone		chemical drug		-1.592	0.000568	AKR1C3,ALDH1A1,ALDOB,CITED2,CTGF,CTSC,EDNRB,FSTL1,GADD45A,HACD3,HPD,Ly6a (includes others),PLA1A,PPOX,SEPHS2,SLC16A1,SLC39A1,TINAGL1
5-N-ethylcarboxamido adenosine		chemical reagent	Activated	2.607	0.000579	ADM,CES1,COL1A2,CTGF,GADD45A,HIF1A,RGS3
CTGF	-1.7	growth factor		-0.169	0.000579	CTGF,HIF1A,MMP14,MMP2,MMP3,NOV,SOX4
ergosterol-5,8-peroxide		chemical - endogenous non-mammalian			0.000579	CTGF,MYD88
F Actin		complex			0.000579	CTGF,MMP2
latanoprost		chemical drug			0.000579	MMP2,MMP3
RAC1	1	enzyme		1.709	0.000579	CD86,COL1A2,CTGF,HIF1A,MMP14,MMP2,NF2
TGFB3	-1.1	growth factor	Activated	2.207	0.000579	ADAM12,COL1A2,COL3A1,MMP2,MMP3,NOV,PLOD2
butylated hydroxyanisol		chemical toxicant		-1.93	0.000588	GSTA3,GSTM4,GSTM5,Gstm6
3-methylcholanthrene		chemical toxicant	Inhibited	-2.161	0.000654	ADM,CYP1A1,GSTA3,GSTM5,Orm1 (includes others)
HNRNPK	1	transcription regulator		0	0.000675	CTGF,IGSF10,MMP3,UCP2
TIMP1	1.4	cytokine		-1.067	0.000675	A4GALT,MMP2,MMP3,PLTP
RLN2		other			0.000697	EDNRB,MMP2,MMP3
AHR	1	ligand-dependent nuclear receptor	Inhibited	-2.615	0.000708	ADAMTS2,ADM,COL14A1,COL1A2,COL3A1,COL5A2,COL6A3,CYP1A1,EHD1,GADD45A,GSTM5,HIF1A,MMP2
HIF1A	1.3	transcription regulator		0.948	0.000711	ADM,CITED2,CTGF,CYB5A,FURIN,HIF1A,HIF3A,KIFC2,MMP2,NOV,PFKFB4,PLOD2,R3HCC1L,SCG2
Pkc(s)		group		-0.519	0.000726	ADM,COL3A1,CTGF,CYP1A1,CYP2E1,GADD45A,GAP43,HIF1A,MMP2,OVOL1
beta-estradiol		chemical - endogenous mammalian		-1.687	0.000749	A4GALT,ACPP,ADM,APOA4,ATF5,C1QTNF6,CAST,CD86,CDK11A,CITED2,COL1A2,COL3A1,COMP,CPXM1,CTGF,CXXC5,CYB5A,CYP1A1,CYP2E1,DHCR7,FBN1,FCGR2B,FNDC5,FSTL1,GADD45A,HSD11B1,IFRD1,LAMB1,LUM,MMP2,PIAS3,RASGRP2,RGS3,RTP4,SCG2,SOX4,SPRY1,SPTAN1,SSR3,SYP,TTR
cigarette smoke		chemical toxicant		-0.587	0.000754	ADM,CYP1A1,CYP2E1,GSTA3,GSTM5,HIF1A,MAP3K4,MMP2,MMP3,Oas1d (includes others)
NPPB		other		0	0.00077	COL3A1,CTGF,EBP,GSTA3
fluticasone		chemical drug		-0.075	0.000826	ADM,CD163,CD86,CES1,HSD11B1,RARRES1,RNASE2,SPRY1,SRPX
tert-butyl-hydroquinone		chemical reagent		-1.213	0.000839	CYP1A1,GADD45A,GSTA3,GSTM5,OSGIN1,SCG2
FECH	-1	enzyme			0.000874	APOA4,COL3A1,COL6A3,CYP2E1
sphingosine-1-phosphate		chemical - endogenous mammalian		-1.124	0.000958	CTGF,GAP43,HIF1A,HSD11B1,MMP14,MYD88
SOX4	1.4	transcription regulator		1	0.00101	BCAR3,CLIC6,CTNNA1,DBNDD2,EMB,Ly6a (includes others),NOV,NREP,RARRES1
INHBA	1.1	growth factor		0.376	0.00105	AKR1C3,AMT,CTGF,F13A1,FURIN,MMP2,NRK,PLOD2,SOX4
ESR1	1.2	ligand-dependent nuclear receptor		0.962	0.00106	AASS,ARHGAP1,ARSG,ATF5,ATG3,C1QTNF5,C1QTNF6,CDC42EP3,CLIC6,COL5A2,CTSC,CYP1A1,DHCR7,HIF1A,IFRD1,LAMB1,MAP3K4,NF2,NOV,PCGF2,PLOD2,RGS3,RTP4,SCARB2,SLC16A1,SOX4,SPTAN1,SSR3,THBS3,TRIB3,TTR,UBXN10
aldosterone		chemical - endogenous mammalian		0.605	0.00112	ADM,COL1A2,COL3A1,CTGF,EMB,MMP2,WNK4
1-O-hexadecyl-2-N-methylcarbamol-sn-glycerol-3-phosphocholine		chemical - endogenous mammalian			0.00115	MMP14,MMP2
ABL2	1.2	kinase			0.00115	MMP14,MMP3
FOXH1	1	transcription regulator			0.00115	ALDH1A1,ALDH1A3
PADI4	-1.1	enzyme			0.00115	GADD45A,OSGIN1
selenomethionine		chemical - endogenous mammalian			0.00115	MMP2,MMP3
TIMP4	-1.7	other			0.00115	MMP14,TIMP4
curcumin		chemical drug	Inhibited	-2.693	0.00119	A4GALT,CD86,COL1A2,CTGF,CTNNA1,CYP1A1,CYP2E1,HIF1A,MMP14,MMP2,MMP3,PIAS3,UCP2
KLF4	1.1	transcription regulator		0.678	0.00127	ALDH1A1,BMPER,CYP1A1,DLX3,EMX2,LAMA1,NF2,OVOL1,S100A14,WNT8B
KRAS	1	enzyme		0.653	0.00128	ANXA8/ANXA8L1,COL3A1,FBN1,FSTL1,GADD45A,HIF1A,Ly6a (includes others),MMP2,MMP3,PCOLCE,PLA1A,THY1,Trim30a/Trim30d
DDR1	1.1	kinase			0.00132	COL3A1,MMP14,MMP2
SB203580		chemical - kinase inhibitor		-1.951	0.00132	BDKRB1,CD86,COL1A2,COL3A1,CTGF,CYP1A1,EDNRB,GADD45A,HIF1A,MMP2,MMP3,POSTN,UCP2
reactive oxygen species		chemical toxicant		0.579	0.00137	CTGF,GADD45A,HIF1A,LAMA1,MMP3,SYP,UCP2
ANGPT2	-1.2	growth factor	Activated	2.557	0.00142	ADAM12,COL1A2,COL3A1,FKBP10,HIF1A,MMP2,POSTN,PROS1,SPTLC3
IFNB1	1.2	cytokine		1.276	0.00146	CD86,CYP1A1,CYP2E1,FBN1,IFI16,LAMB1,MMP2,MYD88,Oas1d (includes others),SPRY1,Trim30a/Trim30d
XDH	-1	enzyme		1.172	0.00155	CTGF,HIF1A,MMP14,MMP2
Jnk		group		1.541	0.00158	CD86,COL3A1,CTGF,GADD45A,GAP43,MMP14,MMP2,MMP3,POSTN
3M-002		chemical reagent			0.00159	CD86,MYD88,TNFSF15
NO 1886		chemical drug			0.00159	CES1,CYP1A1,UCP2
pirfenidone		chemical drug			0.00159	COL3A1,CTGF,POSTN
ursodeoxycholic acid		chemical - endogenous mammalian		-0.447	0.00162	COL1A2,CREBZF,CTGF,CYP1A1,CYP2E1
ADCYAP1	-1	other		0.931	0.00182	CD86,COL3A1,COL5A2,EMB,GAP43,LAMA1,LUM,POSTN,SCG2,UCP2
PAX3	-1.2	transcription regulator			0.00182	ATN1,COL1A2,CRY1,DPEP1,EYA2,GSTM5,LRRC17,PPP1R2,SOX4
STK11	-1.1	kinase		-1.914	0.00183	GADD45A,HIF1A,LUM,MMP2,NPTX2,PPP1R2,SCG2,VIPR2
SLC13A1		transporter		0	0.00185	AKR1C3,ALDH1A1,APOA4,CD163,INMT,SLC16A1
AD-5057		chemical drug			0.00189	HSD11B1,UCP2
SEMA3F	-1.2	other			0.00189	HIF1A,MMP2
IL1B	-1.1	cytokine	Activated	2.481	0.00199	A4GALT,ACPP,ADM,ATF5,BDKRB1,CD86,CTGF,CYP1A1,CYP2E1,F13A1,FCGR2B,GADD45A,HIF1A,HSD11B1,IFI16,IFRD1,MFAP2,MMP14,MMP2,MMP3,POSTN,THY1,TIMP4
Collagen type I		complex	Activated	2.213	0.00201	F13A1,MMP14,MMP2,MMP3,PLOD2
lipoteichoic acid		chemical - endogenous non-mammalian		1.974	0.00201	CAST,CD86,HIF1A,MMP2,MYD88
mir-8		microrna		-0.689	0.00201	ADAM12,CITED2,CUL3,HIF1A,PPP2R1B
SOD2	1.1	enzyme			0.00218	ACPP,ANKRD29,ASB4,MMP2,MMP3,SYP
DAG1	1.1	transmembrane receptor			0.00222	LAMA1,LAMB1,SGCG
leuprolide		biologic drug			0.00222	MMP14,MMP2,MMP3
SIM2	1	transcription regulator			0.00222	GADD45A,MMP2,MMP3
hydrocortisone		chemical - endogenous mammalian		-0.113	0.00228	ADM,CD163,CD86,CTGF,GAP43,HSD11B1,MAP3K4
SMARCB1	1	transcription regulator		1.633	0.0023	COL14A1,COL1A2,COL5A2,CYP2E1,GADD45A,IFI16,POSTN,SGCG
TBX5	1.4	transcription regulator		-1.461	0.0023	COL1A2,COL3A1,IFI16,MYL4,POSTN
SP600125		chemical - kinase inhibitor		-0.103	0.00238	ADM,AKR1C3,CD86,CSPG4,CTGF,CYP1A1,GADD45A,MMP3,POSTN
MAP2K1	1	kinase		1.726	0.00239	COL1A2,COL3A1,CTGF,FURIN,HIF1A,MMP14,MMP2,MMP3
TRIM24	-1	transcription regulator	Inhibited	-2.236	0.00242	DDX60,EMB,FBN1,Ly6a (includes others),MOV10,RTP4
ETS1	-1	transcription regulator		-0.118	0.00263	CDK11A,CITED2,COL1A2,CTGF,MMP2,MMP3,PEG10,SZRD1,THY1
2,5-bis(5-hydroxymethyl-2-thienyl)furan		chemical reagent			0.00281	GADD45A,HIF1A
BDKRB1	1.9	g-protein coupled receptor			0.00281	BDKRB1,CTGF
bergamottin		chemical - endogenous non-mammalian			0.00281	CYP1A1,MMP2
quinapril		chemical drug			0.00281	ADM,CTGF
teichoic acid		chemical - endogenous non-mammalian			0.00281	HIF1A,MMP2
berberine		chemical drug			0.00282	CD86,CYP1A1,CYP2E1,HIF1A,MMP2,UCP2
KDM5B	1	transcription regulator		0	0.00294	CTGF,CYB5A,DHCR24,DPY19L1,EHD1,GADD45A,PPOX
TGFB2	1.2	growth factor		0.938	0.00297	CD248,COL1A2,COL3A1,CTGF,PLOD2,RGS3
SCX	1.2	other			0.00298	COMP,MMP3,POSTN
actinomycin D		chemical drug		0.46	0.00308	ADM,COL1A2,CTGF,CYP1A1,GADD45A,GSTM5,HIF1A,MMP2,MMP3
IL1A	-1.1	cytokine	Activated	2.12	0.00308	ALDH1A1,ALDH1A3,CD86,CYP1A1,CYP2E1,HSD11B1,MMP14,MMP2,MMP3
cobalt chloride		chemical reagent		0.929	0.00317	ADM,CYP1A1,E2F6,HIF1A,HIF3A
U0126		chemical - kinase inhibitor		-1.266	0.00317	CDC42EP3,CTGF,CYP1A1,CYP2E1,EDNRB,EIF1AX,FURIN,HIF1A,MMP2,MMP3,NNAT,NREP,POSTN,SPRY1,SYP
N-acetylsphingosine		chemical reagent		-0.784	0.00327	COL1A2,COL3A1,GSTM5,HSD11B1
CD81	1	other			0.00342	CD86,MMP14,MMP2
mir-30	1.1	microrna			0.00342	ADAM12,CTGF,GADD45A
FGF2	1.1	growth factor		1.158	0.00357	COL1A2,COL3A1,EDNRB,FBN1,GADD45A,GAP43,HIF1A,MMP2,MMP3,NOV,SCG2,SPRY1
EGFR	1.2	kinase	Activated	2.189	0.00367	COL3A1,COL5A2,CTGF,CUL3,FBN1,GADD45A,HIF1A,MMP14,MMP2,MMP3,POSTN
HOXA10	-1.1	transcription regulator		0.426	0.00379	ADM,ALDH1A1,COL3A1,CYP2E1,EMX2,GSTA3,INMT,PROS1
IGFBP2	-1.5	other		1.969	0.00385	COL14A1,MMP2,POSTN,PTGFRN
tripterine		chemical - endogenous non-mammalian			0.00389	ATN1,NF2,TTR
HP	1.2	peptidase			0.0039	CD163,Orm1 (includes others)
PGK1	1.1	kinase			0.0039	MMP2,MMP3
SAV1	-1.1	other			0.0039	CTGF,SOX4
SCGB3A2	-1	other			0.0039	MMP14,MMP2
SLC19A1	-1.1	transporter			0.0039	Ly6a (includes others),Trim30a/Trim30d
WP1066		chemical drug			0.0039	CD86,HIF1A
PD98059		chemical - kinase inhibitor	Inhibited	-2.271	0.00409	CD86,COL1A2,COL3A1,CTGF,CYP1A1,EDNRB,FURIN,GADD45A,GAP43,HIF1A,MMP14,MMP2,MMP3,PLA1A,POSTN,Trim30a/Trim30d
IGF1	1.4	growth factor	Activated	2.525	0.00411	ADM,COL3A1,CTGF,EIF1AX,GAP43,HIF1A,HSD11B1,Ly6a (includes others),MMP14,MMP2,MMP3,PCOLCE,THY1
RUNX2	1.2	transcription regulator		1.491	0.00413	COL1A2,DPYSL3,HIF1A,LUM,MMP14,MMP2
GRB2	1.1	other		0	0.00416	DLX3,EMX2,NF2,OVOL1
ACOX1	1.1	enzyme		-1.134	0.0042	GADD45A,HPD,HSD11B1,Orm1 (includes others),SLC16A1,TRIB3,UCP2
APP	-1.1	other		1.361	0.00432	CALML3,CAST,CD86,CITED2,CLIC6,CTGF,CUL3,EXT1,FCGR2B,GAP43,IFI16,Ly6a (includes others),MMP14,MMP2,MMP3,PRPF40B,RTP4,SPTAN1,SYP,THY1,TNFSF15,TTR
SPARC	-1.1	other		0.896	0.00432	AKR1C3,COL1A2,CYP1A1,MMP2,PCGF2,WNK4
nicotine		chemical drug		0.21	0.00433	CD86,CTGF,CYP2E1,HIF1A,MMP2,POSTN,SCG2,TTR
arotinoid acid		chemical toxicant			0.0044	PLA2G15,PLTP,RARRES1
BGN	1.2	other			0.0044	FBN1,MMP14,PLTP
DPP4	1.1	peptidase			0.0044	CD86,MMP14,MMP2
IL-1R		group			0.0044	COL3A1,MMP14,MMP3
RARA	1.2	ligand-dependent nuclear receptor		-1	0.00441	AASS,ALDH1A1,ARHGAP1,ATF5,GAP43,LAMB1,PRDM8,RGS3,RTP4,UBXN10
STAT6	-1	transcription regulator		1.671	0.00441	Cmah,COL1A2,EXT1,IFI16,Ly6a (includes others),MMP14,MMP2,MOV10,PROS1,Trim30a/Trim30d
EGLN1	-1.1	enzyme		0.445	0.00449	ADM,CD86,HIF1A,MMP3
FOSL2	1	transcription regulator			0.00449	COL1A2,MMP2,MMP3,SOX4
HAND2	-1	transcription regulator		-1.98	0.00449	ALX4,COL1A2,COL3A1,MYL4
ethanol		chemical - endogenous mammalian		-0.623	0.00457	ADM,ALDH1A3,COL1A2,COL3A1,CTGF,CYP2E1,GADD45A,HIF1A,MMP2,MMP3,MYD88,STAU2
PIN1	-1	enzyme		-1	0.00484	COL3A1,MMP2,MMP3,TIMP4
EPAS1	-1	transcription regulator		0.114	0.00492	ADM,CITED2,CTGF,HIF1A,Irs3,MMP14,PLOD2,TNFSF15
ACKR3	1.2	g-protein coupled receptor			0.00495	ADM,AKR1C3,MMP14
ERK		group		1.806	0.00496	BCAR3,COL3A1,CTGF,CYP1A1,LAMB1,MMP14,MMP2,MMP3,SOX4
E. coli B4 lipopolysaccharide		chemical toxicant		1.961	0.00502	CD86,EMB,F13A1,IFI16,Ly6a (includes others),PROS1,RTP4,Snhg5,Trim30a/Trim30d,TTR
acetaminophen		chemical drug		-0.186	0.00506	CAST,CES1,CYP2E1,GADD45A,HIF1A,IFRD1,TTR
forskolin		chemical toxicant		1.215	0.00506	ACPP,ARHGAP1,CD86,CTGF,DHCR7,GADD45A,GAP43,GNAL,GSTM5,HIF1A,HSD11B1,MMP3,NNAT,NPTX2,PEG10,PROS1,SCG2,UCP2
WT1	-1.1	transcription regulator		1.693	0.0051	CREBZF,CSPG4,CTGF,MMP14,MMP2,MMP3,NCSTN,NRAP,SPRY1
APCS	1	other			0.00516	CD163,FCGR2B
PLA2G5	1.3	enzyme			0.00516	COL1A2,COL3A1
tosyllysine chloromethyl ketone		chemical - protease inhibitor			0.00516	BDKRB1,CYP1A1
ZNF91	-1	transcription regulator			0.00516	FCGR2B,POSTN
SIAH2	1.1	transcription regulator			0.00554	ACPP,DHCR24,HIF1A
salicylic acid		chemical drug		-1.114	0.00558	CTGF,CUL3,CYP2E1,HIF1A
ARNT	1	transcription regulator		0.321	0.0056	ADM,CITED2,CYP1A1,FURIN,HIF1A,MYO1C
EDN1	-1.2	cytokine		1.889	0.00593	ADAM12,COL1A2,COMP,CTGF,EDNRB,HIF1A,MMP2,MMP3
2,3,4,7,8-pentachlorodibenzofuran		chemical toxicant		-1.067	0.00598	CES1,CYB5A,CYP1A1,GADD45A
diallyl disulfide		chemical - endogenous non-mammalian			0.00617	CYP2E1,GSTA3,GSTM5
vinblastine		chemical drug			0.00617	CD86,CYP1A1,HIF1A
2,4-dinitrobenzenesulfonic acid		chemical reagent			0.00657	CD86,HIF1A
Ccl6	1.3	cytokine			0.00657	MMP2,TIMP4
MAPKAP1	-1.1	other			0.00657	HIF1A,IFI16
miR-451a (and other miRNAs w/seed AACCGUU)		mature microrna			0.00657	AKTIP,MMP2
nedocromil sodium		chemical drug			0.00657	COL3A1,MMP2
RALBP1	-1.1	enzyme			0.00657	COL1A2,MMP2
ERBB4	-1	kinase		1.342	0.00682	COL3A1,COL5A2,GADD45A,GAP43,HIF1A
oblimersen		biologic drug		-1	0.00684	ADM,GADD45A,IFI16,IFRD1
PDGFB	-1.1	growth factor			0.00684	COL1A2,MMP2,MMP3,NOV
mifepristone		chemical drug		-1.32	0.00691	ADM,COL5A2,CTGF,CTNNA1,EDNRB,FCGR2B,HSD11B1,Ly6a (includes others),MMP3,POSTN
IL3		cytokine		0.447	0.00703	ATF5,CD86,CITED2,EIF1AX,FCGR2B,GADD45A,MYO1C,NOV,PDE1B,SOX4,UCP2
N-nitro-L-arginine methyl ester		chemical drug		0.751	0.00716	ADM,CD86,COL1A2,COL3A1,CTGF
dihydrotestosterone		chemical - endogenous mammalian		0.667	0.00727	ACPP,ADM,ALDH1A3,CLIC6,COL3A1,COL5A2,CTGF,DHCR24,GAP43,MMP2,PIAS3,POSTN,PROS1,SLC7A7,SYP
decitabine		chemical drug		0.872	0.00733	COL1A2,COL3A1,COL6A3,CTGF,CYP1A1,GPAT2,IFI16,LUM,MMP14,MMP2,MMP3,NPTX2,RARRES1,RTP4
LEP	-1.3	growth factor		0.767	0.00743	ALDOB,APOA4,COL3A1,CYB5A,CYP2E1,GADD45A,GAP43,GSTA3,MMP14,MMP2,MMP3,SLC16A1,UCP2
CD40LG	-1.2	cytokine		1.817	0.00755	A4GALT,ATF5,CAST,CD86,CTGF,CTSC,FCGR2B,FURIN,GADD45A,HIF1A,MAP3K4,MMP14
IRS1	-1.1	enzyme			0.00772	COL3A1,COL6A3,MMP14,MYL4,TRIB3,UCP2
LIPE	-1.2	enzyme			0.00772	ALDH1A1,CITED2,COL1A2,INMT,POSTN,SCARB2
LCN2	1.5	transporter		1.165	0.00777	ATF5,HIF1A,MMP2,TINAGL1
CREB1	1.1	transcription regulator		-0.577	0.00789	ADM,ATF5,EBP,GADD45A,GAP43,GNAL,HSD11B1,IGSF10,NNAT,NPTX2,NREP,PEG10,SCG2,SERINC5,SLC16A1
mir-223		microrna		0.928	0.00802	CYB5A,GSTM5,IFI16,Ly6a (includes others),POSTN,SLC39A1
(+)-catechin		chemical drug			0.00814	CYP2E1,SLC16A1
beraprost		chemical drug			0.00814	CD86,COL3A1
elastase		group			0.00814	MMP2,MMP3
LGALS3BP	1.1	transmembrane receptor			0.00814	MMP14,MMP3
montelukast		chemical drug			0.00814	MMP3,RNASE2
PHF21A	-1.1	other			0.00814	SCG2,SYP
RANBP9	-1	other			0.00814	GAP43,SYP
RLIM	1.1	enzyme			0.00814	CTGF,LDB1
S-equol		chemical drug			0.00814	CD86,MMP2
Trolox C		chemical drug			0.00814	HIF1A,UCP2
deferoxamine		chemical drug		0.391	0.00815	ADM,ANGPT4,CITED2,GADD45A,HIF1A,IFI16,MMP2
BSG	1	transporter			0.0083	HIF1A,MMP2,MMP3
CCNK	1	kinase			0.0083	PLTP,SMARCC2,UCP2
MEF2D	-1	transcription regulator			0.0083	COL1A2,COL3A1,CTGF
NCOA4	1	transcription regulator			0.0083	CTGF,GNAL,PLTP
NFKBIA	-1.1	transcription regulator		-0.088	0.0083	CD86,COL1A2,COL3A1,COL5A2,CTNNA1,GADD45A,GSTM5,HIF1A,IFI16,MMP14,MMP3,NRK,RGS3
tosedostat		chemical drug			0.0083	ATF5,GADD45A,TRIB3
IgG		complex		1.416	0.00841	ADM,CD86,COL3A1,CTSC,DHCR7,FCGR2B,TNFSF15
TAF4	-1	transcription regulator		-0.849	0.00863	CTGF,LRRC15,LUM,MMP2,MMP3
trinitrobenzenesulfonic acid		chemical reagent	Activated	2.183	0.00863	ADAM12,COL1A2,COL3A1,LUM,MMP3
ABCB4	-1.1	transporter			0.0091	COL1A2,CTGF,MMP2
CGA	-1	other			0.0091	MMP14,MMP2,SFRP5
KNG1	1.2	other			0.0091	BDKRB1,COL1A2,CTGF
miR-21-5p (and other miRNAs w/seed AGCUUAU)		mature microrna			0.0091	MMP2,MYD88,SPRY1
1,2-dithiol-3-thione		chemical reagent		-0.097	0.00914	APOA4,DHCR7,GSTA3,GSTM5,HACD3,INMT,SEC61A1,TTR
LEPR	1	transmembrane receptor			0.00925	APOA4,CYP2E1,GAP43,MMP14,MMP2,MMP3,UCP2
IL6	-1.1	cytokine	Activated	2.496	0.00948	CD163,CD86,CES1,COL3A1,CTGF,CTSC,CYP1A1,CYP2E1,GADD45A,HIF1A,IFI16,MMP2,MMP3,MYD88,Orm1 (includes others),SLC7A7,SYP,TTR
FOXO3	1.1	transcription regulator		-1.561	0.00954	CDC42EP3,CTGF,GABRR2,GADD45A,GSTM5,OVOL1,UCP2
DSP	1.4	other			0.00985	COL1A2,COL3A1
hemoglobin		complex			0.00985	ADM,CD163
hesperetin		chemical drug			0.00985	DHCR24,MMP3
NEUROD2	1.1	transcription regulator			0.00985	DPYSL3,GAP43
rosmarinic acid		chemical - endogenous non-mammalian			0.00985	CTGF,MMP2
TLR2/3/4/9		group			0.00985	CD86,FCGR2B
MMP9	-1.2	peptidase			0.00988	GADD45A,MMP14,MMP2,MMP3
GPD1	1	enzyme			0.0103	APOA4,CD248,GADD45A,PIAS3,RARRES1
NKX2-3	1.1	transcription regulator		0.069	0.0107	ADM,DDX60,MYD88,PLA1A,POSTN,PRSS12,RTP4,SRPX
MTOR	-1.1	kinase	Activated	2.164	0.011	ADM,CD86,CITED2,GAP43,GSTM5,HIF1A,HSD11B1,IFI16,SRPX
F3	-1.2	transmembrane receptor		0	0.0111	CTGF,LAMB1,MMP2,SPRY1
KIAA1524	1.2	other		1	0.0111	CORO6,GADD45A,LAMA1,LUM
plicamycin		chemical drug		0.44	0.0112	COL1A2,CTGF,CYP2E1,GFRA2,HIF1A
SLC25A13	1.2	transporter			0.0112	APOA4,CD248,GADD45A,PIAS3,RARRES1
ATN1	-1.2	transcription regulator			0.0115	BMP1,DPYSL3,IFI16,NREP,PDE1B,SOX4
acetovanillone		chemical drug			0.0117	MMP2,OSGIN1,UCP2
harmine		chemical - endogenous non-mammalian			0.0117	CYP1A1,MMP2
mercuric chloride		chemical toxicant			0.0117	CYP2E1,GADD45A,Orm1 (includes others)
NELFB	-1	other			0.0117	CTGF,GADD45A
NOS3	1.1	enzyme			0.0117	CD86,MMP14,MMP2
SMAD3	-1	transcription regulator		1.117	0.0119	APOA4,COL1A2,COL3A1,COL6A3,CTGF,FNDC5,LUM,Orm1 (includes others)
ERN1	1.1	kinase			0.0123	CYP2E1,PROS1,SPTLC3,TINAGL1
MKNK1	1.1	kinase		1.342	0.0127	CAMK2A,DPYSL3,GAP43,IFRD1,PLTP
RPS6KB1	-1.2	kinase			0.0127	DHCR24,EIF1AX,HIF1A
TLR4	1.1	transmembrane receptor		1.946	0.0128	ACPP,ADM,CAST,CD163,CD86,CITED2,FCGR2B,IFI16,MYD88,PLA1A
APOE	-1.1	transporter		-0.283	0.0132	CD86,CTGF,FCGR2B,HSD11B1,MMP2,MMP3,SYP,THY1
methapyrilene		chemical drug		0	0.0136	ALDOB,CES1,GADD45A,IFRD1,PPP1R2,TTR
1-chloro-2-(2,2,2-trichloro-1-(4-chlorophenyl)ethyl)benzene		chemical toxicant			0.0137	APOA4,GADD45A
aphidicolin		chemical toxicant			0.0137	GADD45A,MMP3
clenbuterol		chemical drug			0.0137	CAST,SLC16A1
CYP51A1	1.2	enzyme			0.0137	DHCR24,EBP
Hnf3		group			0.0137	ALDOB,TTR
phencyclidine		chemical drug			0.0137	SCG2,SYP
pimagedine		chemical drug			0.0137	CAST,CTGF,LAMB1
silibinin		chemical drug		-1.282	0.0137	CTGF,HIF1A,MMP2,MMP3
cephaloridine		chemical drug		-0.651	0.0138	APOA4,CTGF,CXCL14,GSTM5,TRIB3
WNT3A	-1	cytokine		0.426	0.0138	ALDH1A3,CTGF,GAP43,LRRC17,MMP14,SPRY1,THY1,TRIB3
(des-Arg10,Leu9)-kallidin		chemical reagent			0.014	CTGF
1,1,1-trichloroethane		chemical toxicant			0.014	CYP2E1
2,4-dichlorobenzamil		chemical reagent			0.014	CTGF
2-amino-3-methylimidazo(4,5-f)quinoline		chemical toxicant			0.014	CYP1A1
AHRR	1.3	other			0.014	CYP1A1
anthracene		chemical toxicant			0.014	CYP1A1
artemether		chemical drug			0.014	MMP2
beta-tocopherol		chemical - endogenous mammalian			0.014	CTGF
CITED4	1.2	transcription regulator			0.014	HIF1A
CKAP4	1.2	other			0.014	CTGF
dixanthogen		chemical toxicant			0.014	GSTM5
DPAGT1	1	enzyme			0.014	CTHRC1
DSG2	1.1	other			0.014	SCG2
EHD4	1.2	enzyme			0.014	EHD1
estramustine		chemical drug			0.014	CYP1A1
FMOD	-1.1	other			0.014	LUM
FSCN1	1.1	other			0.014	MMP2
GTx-560		chemical reagent			0.014	PROS1
harmaline		chemical drug			0.014	CYP1A1
harman		chemical - endogenous non-mammalian			0.014	CYP1A1
ketone body		chemical - endogenous mammalian			0.014	CYP2E1
KLHL3	1	other			0.014	WNK4
LAMC2	1.1	other			0.014	MMP2
levocetirizine		chemical drug			0.014	MMP2
LGR5	-1.2	transmembrane receptor			0.014	AKR1C3
MAP4	-1.1	other			0.014	HIF1A
methylphenazonium methosulfate		chemical toxicant			0.014	HIF1A
MT-ND2		enzyme			0.014	HIF1A
NAPB	-1.1	transporter			0.014	CYP1A1
naphthalene-1-2-dione		chemical toxicant			0.014	CYP1A1
neuropeptide Y		biologic drug			0.014	UCP2
NNMT	1	enzyme			0.014	SYP
oxamic acid		chemical - endogenous non-mammalian			0.014	HIF1A
PAIP2	-1	translation regulator			0.014	CAMK2A
PI4K2A	1.1	kinase			0.014	HIF1A
pinitol		chemical drug			0.014	CYP2E1
PLEKHA1	1	other			0.014	CD86
PLEKHA2	-1.1	other			0.014	CD86
polyglactin 910		chemical reagent			0.014	MMP2
RO31-9790		chemical - protease inhibitor			0.014	GAP43
S100A14	1.8	other			0.014	MMP2
SB202474		chemical - kinase inhibitor			0.014	CYP1A1
SLC30A9	-1	transporter			0.014	CYP1A1
SPAST	1.1	enzyme			0.014	EMX2
SPOCK1	1.3	other			0.014	MMP2
sterigmatocystin		chemical toxicant			0.014	CYP1A1
thiabendazole		chemical drug			0.014	CYP1A1
trans-7,8-dihydroxy-7,8-dihydrobenzo(a)pyrene		chemical toxicant			0.014	CYP1A1
ZNF140		transcription regulator			0.014	FCGR2B
FAS	-1	transmembrane receptor		-1.018	0.0147	CAST,CD86,COL1A2,COL3A1,COL6A3,CTGF,FBN1,FCGR2B,LUM,RASGRP2,RGS3
ADORA2B	1.2	g-protein coupled receptor			0.0148	CD86,COL1A2,HIF1A
AGTR1	-1.1	g-protein coupled receptor			0.0148	COL3A1,GSTM5,Gstm6
CYR61	-1.2	other			0.0148	COL1A2,HIF1A,MMP3
ibuprofen		chemical drug			0.0148	EDNRB,HIF1A,MMP2
2-amino-5-phosphonovaleric acid		chemical - other		-0.816	0.0149	ADAMTS2,EXT1,FURIN,GADD45A,IFRD1,TCHP
ERK1/2		group		1.42	0.015	AKR1C3,CD86,COL3A1,CTGF,HIF1A,MMP2,MMP3,PFKFB4,POSTN
SPDEF	1	transcription regulator		-1	0.0151	COL5A2,COL6A3,CTGF,HIF1A
ESR2	-1.1	ligand-dependent nuclear receptor		-0.378	0.0154	A4GALT,ATF5,CES1,COMP,CTGF,DHCR7,EMB,MMP14,MMP2,NOV,SOX4,SPTAN1
MYOD1	-1	transcription regulator		-0.831	0.0155	FNDC5,FSTL1,GADD45A,IFI16,MMP2,MYL4,POSTN
NOS2	-1.1	enzyme		1.432	0.0155	CD86,CTSC,CYP2E1,HIF1A,Orm1 (includes others),SYP,THY1
TGFBR2	1.3	kinase		0.294	0.0155	COL1A2,CTGF,HSD11B1,MMP14,MMP2,MMP3,NIPA2
ACVR1	-1.1	kinase			0.0159	FSTL1,NOV,PROS1
ADAM17	1.2	peptidase			0.0159	ADAM12,COL3A1,MMP2
H2AFY	1.1	other			0.0159	ALDH1A3,CITED2,GADD45A
KCNE3	-1.1	ion channel			0.0159	4930486L24Rik,ACPP,AKR1C3,OSGIN1
mir-143	1	microrna			0.0159	COL3A1,MMP2
mirtazapine		chemical drug			0.0159	CYP1A1,CYP2E1
myricetin		chemical - endogenous non-mammalian			0.0159	CYP1A1,SLC16A1
NFYC	1	transcription regulator			0.0159	COL1A2,CSDE1,EMX2
Pam3-Cys		chemical toxicant			0.0159	CD163,CD86,MYD88
PTPRE	1.2	phosphatase			0.0159	ACPP,PLA1A
xanthine		chemical - endogenous mammalian			0.0159	MMP14,MMP2
pyrrolidine dithiocarbamate		chemical reagent		-1.36	0.016	BDKRB1,CTGF,HIF1A,MMP14,MMP2
Tgf beta		group		0.915	0.016	ADAM12,COL1A2,CTGF,FSTL1,FURIN,MMP2,MMP3,POSTN
BCL2	1	transporter		0.593	0.0167	GADD45A,GAP43,HIF1A,MMP2,NNAT
doxorubicin		chemical drug		0.556	0.0167	ADM,COL3A1,CTGF,EFEMP2,GADD45A,GTPBP4,HIF1A,Irs3,MMP2,OSGIN1,PLA1A
sulindac sulfide		chemical drug		-1.009	0.0167	CTGF,CYP1A1,GADD45A,IFRD1
TGFBR1	1.1	kinase		-0.911	0.0167	CD86,COL1A2,CTGF,RGS3
STAT3	1.2	transcription regulator		1.851	0.0168	ADM,APOA4,CD86,COL1A2,COL3A1,CTGF,GADD45A,HIF1A,IFI16,MMP2,MMP3,MYD88,PEG10
HDL		complex			0.017	CD86,HIF1A,MYD88
losartan potassium		chemical drug		-0.182	0.0173	COL3A1,CTGF,MMP2,POSTN,UCP2
IL5	1	cytokine		0.853	0.0174	CITED2,CTSC,EBP,FCGR2B,GADD45A,HIF1A,LUM,RASGRP2,THY1
LDL		complex		1.502	0.0175	CTGF,EDNRB,EMB,FCGR2B,HIF1A,MMP14,MMP2,MMP3
butyric acid		chemical - endogenous mammalian		0.282	0.0176	ALDH1A1,CD86,COL5A2,COL6A3,CYP1A1,DHCR24,FSTL1,FURIN,GADD45A,IFI16,MYL4,NF2
alpha-tocopherol succinate		chemical drug			0.0181	HIF1A,UCP2
BDKRB2	-1.1	g-protein coupled receptor			0.0181	BDKRB1,CTGF
EDNRA	1.1	transmembrane receptor			0.0181	COL3A1,MMP2
NREP	1.5	other			0.0181	COL3A1,MMP2
SPTLC2	1.1	enzyme			0.0181	CTGF,MMP2
STK3	1	kinase			0.0181	CTGF,SOX4
cholesterol		chemical - endogenous mammalian		0.243	0.0182	COL3A1,DHCR7,FCGR2B,MMP14,MMP2,Orm1 (includes others),PLTP
H-7		chemical - kinase inhibitor			0.0182	COL1A2,CYP1A1,MMP3
paclitaxel		chemical drug			0.0182	CD86,CDC42EP3,CTGF,CYP1A1,CYP2E1,HIF1A,NNAT,NREP,SPRY1
TXN	1.1	enzyme			0.0182	CD86,CYP1A1,HIF1A
EGF	-1	growth factor		1.523	0.019	COL1A2,COL3A1,CTGF,CXCL14,CYP1A1,FSTL1,GADD45A,HIF1A,MMP2,MMP3,SCG2,SOX4,SYP
MAPK9	-1	kinase		0.336	0.0191	BMP1,CYP1A1,HIF1A,IFI16,MMP3,PLA1A
sirolimus		chemical drug		-1.837	0.0191	ADM,CD86,COL1A2,CYP2E1,EIF1AX,GAP43,HIF1A,MMP14,MMP2,MMP3,POSTN,UCP2
cyclosporin A		biologic drug		-1.731	0.0194	ACPP,CD163,CD86,CTGF,EDNRB,EFEMP2,GTPBP4,HIF1A,MMP14,MMP2,MMP3,POSTN
cytochalasin D		chemical toxicant			0.0195	CTGF,MMP14,MMP2
MUC1		transmembrane receptor			0.0195	ALDH1A1,CD86,HIF1A
T3-TR-RXR		complex			0.0195	AKR1C3,COL6A3,UCP2
cyclophosphamide		chemical drug		0.849	0.02	GAP43,GTPBP4,Ly6a (includes others),PLA1A
RORC	-1.3	ligand-dependent nuclear receptor			0.0202	APOA4,ARSG,CYP2E1,DHCR24,GSTM4,HIF1A
AQP1	-1.2	transporter			0.0205	ALDOB,CES1
Diphtheria Toxin		chemical reagent			0.0205	COL1A2,COL3A1
INHBB	1.1	growth factor			0.0205	COL3A1,MMP3
MMP12	1.1	peptidase			0.0205	MMP14,MMP2
NCAM1	1.6	other			0.0205	SYP,THY1
N-acetyl-L-cysteine		chemical drug		-1.316	0.0206	ADM,CD86,CTGF,HIF1A,MMP2,OSGIN1,SLC16A1
RETN	-1.1	other			0.0208	CTGF,FURIN,MMP14
captopril		chemical drug		1	0.021	CYP2E1,EFEMP2,GTPBP4,POSTN
IFI16	1.3	transcription regulator		-0.747	0.021	CYP1A1,GADD45A,IFI16,MKRN2
FGF1	-1	growth factor		0.32	0.0213	CTGF,GSTM5,LRRC17,POSTN,TTR
HNF1A	-1.1	transcription regulator		-1.039	0.0213	AKR1C3,ALDOB,ATG3,COL3A1,CYB5A,CYP2E1,HSD11B1,NPTX2,PLA1A,TTR,UCP2,WNK4
hydrogen peroxide		chemical - endogenous mammalian		0.713	0.0213	CD86,COL1A2,CTGF,CYP1A1,DHCR7,GADD45A,HIF1A,MMP2,MMP3,OSGIN1,TRIB3,UCP2
carbon tetrachloride		chemical toxicant		1.081	0.0217	COL1A2,COL3A1,CTGF,Cyp2d22,CYP2E1,GADD45A,MMP2
gentamicin		chemical drug		-0.194	0.0219	ALDH1A1,CYP1A1,DPEP1,GADD45A,GSTM5,IFRD1,THY1,TTR
HMGB1		transcription regulator		1.98	0.0219	CD86,HIF1A,MMP3,SYP
ABCB6	-1	transporter			0.0221	CYP1A1,Cyp2d22,PPOX
AVP	-1	other			0.0221	ADM,COL3A1,EDNRB
NME1	1.1	kinase			0.0221	CTGF,MMP14,MMP2
spironolactone		chemical drug		0.152	0.0228	COL1A2,COL3A1,CTGF,EDNRB
batimastat		chemical - protease inhibitor			0.0231	MMP14,MMP2
ethoxyquin		chemical toxicant			0.0231	GSTA3,GSTM5
FZD9	1.2	g-protein coupled receptor			0.0231	CXCL14,IFI16
Iga		complex			0.0231	CD86,FCGR2B
isoliquiritigenin		chemical - endogenous non-mammalian			0.0231	CTGF,MMP2
magnolol		chemical - endogenous non-mammalian			0.0231	HIF1A,MMP2
MMP1	-1	peptidase			0.0231	HIF1A,PLTP
NMDA Receptor		complex			0.0231	CAMK2A,SYP
p85 (pik3r)		group			0.0231	HIF1A,MMP2
perindopril		chemical drug			0.0231	CTGF,MMP2
piperine		chemical drug			0.0231	MMP14,MMP3
STK4	1	kinase			0.0231	MMP2,PROS1
L-triiodothyronine		chemical - endogenous mammalian		-1.035	0.0239	ADM,AGTRAP,ALDH1A1,BCAR3,CTGF,FKBP10,HIF1A,HSD11B1,MMP14,UCP2
BDNF	-1.1	growth factor		0.343	0.0244	CAMK2A,CSPG4,DPYSL3,GAP43,IFRD1,MYL4,PLTP,PRSS12,SYP
SRC	-1	kinase		0.793	0.0244	COL1A2,CYP1A1,HIF1A,MMP2,POSTN
Cg		complex		1.926	0.0248	ACPP,ADM,AKR1C3,DHCR7,DPT,EMB,HIF1A,HSD11B1,MMP2,TIMP4
DYSF	-1.1	other			0.0248	FCGR2B,IFI16,MYL4,PROS1
IFN alpha/beta		group		1.213	0.0248	CD86,CXCL14,IFI16,Ly6a (includes others)
candesartan		chemical drug			0.0249	ADM,COL1A2,COL3A1
dimethylnitrosamine		chemical toxicant			0.0249	COL1A2,COL3A1,CYP2E1
dichlororibofuranosylbenzimidazole		chemical toxicant			0.0257	CYP1A1,HIF1A
GLIS2	1.1	transcription regulator			0.0257	CTGF,MMP14
lisinopril		biologic drug			0.0257	CAST,MMP2
TFEC	1.2	transcription regulator			0.0257	COL6A3,F13A1
SP3	1	transcription regulator		-0.762	0.0262	CES1,CITED2,COL1A2,DLX3,LAMA1,MMP2,RASGRP2
3,4,5,3',4'-pentachlorobiphenyl		chemical toxicant		-1.129	0.0269	CES1,CYB5A,CYP1A1,GADD45A
IGF2	-1.1	growth factor			0.0273	CRY1,CTGF,DHCR7,GADD45A,HIF1A,MMP3
mir-21		microrna		0.441	0.0273	COL3A1,IFI16,MMP2,MYD88,Orm1 (includes others),SPRY1
IL1RN	1.2	cytokine		-0.555	0.0277	BDKRB1,CYP2E1,HSD11B1,RARRES1,RTP4
2,2',4,4'-tetrabromodiphenyl ether		chemical reagent			0.0278	CYP1A1
8-methyl-pyridoxatin		chemical reagent			0.0278	HIF1A
AGXT	1.2	enzyme			0.0278	COL3A1
Alpha 1 antitrypsin		group			0.0278	MMP2
alpha-endosulfan		chemical toxicant			0.0278	CYP1A1
AMOT	-1.1	other			0.0278	CTGF
benzo(a)pyrene-7,8-dione		chemical toxicant			0.0278	CYP1A1
BR-4628		chemical reagent			0.0278	CTGF
BTBD7	1	other			0.0278	MMP2
CCL20	-1	cytokine			0.0278	POSTN
CHCHD4	1	enzyme			0.0278	HIF1A
COX6A2	1.2	enzyme			0.0278	UCP2
DERL1	-1.1	other			0.0278	MMP2
DF 203		chemical drug			0.0278	CYP1A1
dibenzo(a,l)pyrene		chemical toxicant			0.0278	CYP1A1
dimethyl succinate		chemical - endogenous mammalian			0.0278	SLC16A1
E64		chemical - endogenous non-mammalian			0.0278	MMP2
EFEMP2	1.4	other			0.0278	CTGF
EGOT		other			0.0278	RNASE2
EIF2A	1.1	translation regulator			0.0278	ATF5
FKRP	-1	other			0.0278	LAMA1
GFRA1	1.1	transmembrane receptor			0.0278	ACPP
IBSP	1.1	other			0.0278	MMP2
indolo(3,2-b)carbazole		chemical reagent			0.0278	CYP1A1
interferon gamma-1b		biologic drug			0.0278	CD163
isoniazid		chemical drug			0.0278	CYP2E1
L3MBTL1	-1.2	other			0.0278	MMP3
LAMB2	-1.2	enzyme			0.0278	LAMB1
lavendustin A		chemical - kinase inhibitor			0.0278	CYP1A1
LEFTY2	1.1	growth factor			0.0278	MMP3
loganin		chemical - endogenous non-mammalian			0.0278	CTGF
lonidamine		chemical drug			0.0278	4930486L24Rik
miR-129-5p (miRNAs w/seed UUUUUGC)		mature microrna			0.0278	SOX4
mir-346		microrna			0.0278	EFEMP2
N(6)-carboxymethyl-L-lysine		chemical - endogenous mammalian			0.0278	CTGF
phenylhydrazine		chemical toxicant			0.0278	Orm1 (includes others)
phosphoramidon		chemical - endogenous non-mammalian			0.0278	EDNRB
primaquine		chemical drug			0.0278	CYP1A1
PRSS2	1	peptidase			0.0278	MMP3
PSB-1115		chemical reagent			0.0278	HIF1A
PTGIS	1.1	enzyme			0.0278	CYP2E1
reactive nitrogen species		chemical - other			0.0278	HIF1A
S-adenosylhomocysteine		chemical - endogenous mammalian			0.0278	COL1A2
sulfur		chemical - endogenous mammalian			0.0278	MMP2
TJP1	-1.1	other			0.0278	MMP14
TRIP11	1.1	transcription regulator			0.0278	CYP1A1
Vcsa1/Vcsa2		other			0.0278	HIF1A
ZNF197		transcription regulator			0.0278	HIF1A
ZNF350		transcription regulator			0.0278	GADD45A
C/ebp		group			0.0279	CYP1A1,HIF1A,HSD11B1
plerixafor		chemical drug			0.0285	Ly6a (includes others),MMP3
Rp-cAMPS		chemical - kinase inhibitor			0.0285	MMP14,MMP3
Sb202190		chemical - kinase inhibitor		0.655	0.0285	CD86,CTGF,CYP1A1,HIF1A,MMP2
SP100		transcription regulator			0.0285	CTGF,THY1
cycloheximide		chemical reagent	Inhibited	-2.01	0.0288	ADM,BDKRB1,CAMK2A,CITED2,CTGF,CYP1A1,GADD45A,GAP43,HSD11B1,MMP2
CAMP	-1.1	other		0.832	0.0291	BMP1,CD86,IL1RL2,MYD88
NS-398		chemical reagent		-1.981	0.0291	COL1A2,HIF1A,MMP14,MMP2
SMAD4	-1	transcription regulator		-0.869	0.0293	APOA4,CDC42EP3,CITED2,COL1A2,CTGF,GADD45A,OVOL1
PTK2	-1.1	kinase			0.0294	COL1A2,CSPG4,MMP2
nitrofurantoin		chemical drug		0.816	0.0295	CES1,GADD45A,GTPBP4,IFRD1,MMP14,TTR
PPARGC1A	-1.1	transcription regulator		-0.396	0.03	APOA4,COMP,CYP1A1,FNDC5,TCHP,TRIB3,UCP2
VHL	1.2	transcription regulator			0.0303	ALDH1A1,CTGF,HIF1A,MMP14,NREP
D-glucose		chemical - endogenous mammalian		0.63	0.0308	ALDOB,ATF5,COL3A1,CTGF,CYP2E1,HIF1A,LAMB1,MMP14,MMP2,SEC61A1,SEPHS2,SSR3,UCP2
NOG	1.2	growth factor			0.0311	CTGF,CXXC5,MMP3
cisplatin		chemical drug		0.336	0.0312	ALDH1A3,CTGF,CXCL14,EFEMP2,GADD45A,GAP43,GKAP1,GTPBP4,HIF1A,LAMB1,MMP2,NREP,PCGF2,PLA1A,UCP2
ACKR1	1.2	g-protein coupled receptor			0.0313	CITED2,IFI16
carvedilol		chemical drug			0.0313	GAP43,MMP2
ELOVL5	1.1	enzyme			0.0313	PLTP,TRIB3
EZR	1.1	other			0.0313	MMP14,MMP2
F10	1.2	peptidase			0.0313	CTGF,MMP2
salvin		chemical toxicant			0.0313	CES1,MMP3
SENP1	-1	peptidase			0.0313	MMP2,UCP2
ZNF202	-1.1	transcription regulator			0.0313	APOA4,PLTP
ALKBH5	-1	enzyme			0.0314	EIF4G3,GSTM5,LAMA1,NF2
vancomycin		biologic drug		1.982	0.0314	AASS,EFEMP2,GTPBP4,PLA1A
IRF3	-1.1	transcription regulator	Activated	2.219	0.0318	CD86,IFI16,MFAP2,MMP3,NRAP,Trim30a/Trim30d
dimethyl sulfoxide		chemical drug		-0.391	0.0321	ADAM12,CYP1A1,CYP2E1,IFI16,MYL4
SMARCA4	1.1	transcription regulator		-0.089	0.0323	ALDH1A3,CORO6,CTGF,CYP1A1,ENTPD3,GADD45A,IFI16,LDB1,LUM,MMP2,MYL4,SRPX,THY1,TTR
ADRA1A	-1.1	g-protein coupled receptor			0.0327	ADAM12,COL3A1,CYP1A1
CDKN2A	-1.4	transcription regulator		-1.6	0.0334	CITED2,CTGF,CXCL14,E2F6,GFRA2,HACD3,MMP2,MMP3
arachidonic acid		chemical - endogenous mammalian		0.392	0.0337	CD86,COL1A2,PLTP,UCP2
daidzein		chemical drug			0.0337	AKR1C3,CD86,CYP1A1,FCGR2B
MET	-1.1	kinase		-0.762	0.0337	CITED2,MMP2,NREP,TCHP
TCF		group			0.0337	ALDH1A1,DPEP1,F13A1,MMP2
acetaldehyde		chemical - endogenous mammalian			0.0343	COL1A2,MMP2
ALDH2	-1.2	enzyme			0.0343	ATF5,GSTA3
Collagen type IV		complex			0.0343	MMP14,MMP2
nickel		chemical toxicant			0.0343	CD86,HIF1A
PER1	-1	other			0.0343	CRY1,WNK4
RPTOR	1	other			0.0343	CD86,HIF1A
L-methionine		chemical - endogenous mammalian			0.0344	CYP2E1,IFI16,NF2
Ifn gamma		complex		0	0.035	CD86,LAMA1,Ly6a (includes others),MYD88
HNF4A	-1.1	transcription regulator		-1.29	0.0352	AASS,AKR1C3,ALDH1A1,ALDOB,AMT,APOA4,ATG3,CDC42EP3,CRY1,CYP1A1,CYP2E1,DLX3,EBP,EMX2,FKBP10,FURIN,GSTM4,HIF1A,HPD,HSD11B1,ITGA9,LDB1,MOV10,NF2,OVOL1,P2RY14,PCGF2,PEG10,PFKFB4,RNASE2,SAMM50,SLC39A1,SMIM7,SSR3,STAU2,THY1,TTR,UCP2
IFNA2		cytokine	Activated	2.155	0.0355	ATF5,CD86,CYB5A,DDX60,HIF1A,IFI16,NPTX2
colchicine		chemical drug			0.0361	CTGF,GAP43,HIF1A
enalapril		chemical drug			0.0361	EFEMP2,GTPBP4,UCP2
MAPKAPK2	1.1	kinase			0.0361	CITED2,MMP2,PLA1A
NR4A3	1.4	ligand-dependent nuclear receptor			0.0361	AASS,HIF1A,UCP2
PTPRJ	1.3	phosphatase			0.0361	ACPP,CITED2,PLA1A
FOS	-1.2	transcription regulator		-1.134	0.0364	4930486L24Rik,ADAM12,AKR1C3,ALDH1A3,BCAR3,CAST,CTGF,EMB,FBN1,FSTL1,MMP2,MMP3,NPTX2
FOXA2	1.1	transcription regulator		-0.152	0.0367	ALDOB,PROS1,RNASE2,THBS3,TTR,UCP2
dextran sulfate		chemical drug			0.037	CD86,CTGF,EFEMP2,GSTM5,MMP14,MMP2,STEAP3
epigallocatechin-gallate		chemical drug		-0.468	0.037	CTGF,GADD45A,HIF1A,MMP2,MMP3,SCG2,SLC16A1
NOTCH1	-1.2	transcription regulator		-0.509	0.037	COL1A2,CTGF,FCGR2B,IFI16,Ly6a (includes others),MMP2,SYP
EIF4G1	-1	translation regulator			0.0374	GADD45A,HIF1A
GABA		chemical - endogenous mammalian			0.0374	MMP2,MMP3
NFIX	-1	transcription regulator			0.0374	ADAM12,POSTN
NOV	2.1	growth factor			0.0374	CTGF,MMP2
NOX4	1.1	enzyme			0.0374	HIF1A,MMP2
SFTPD	-1.2	other			0.0374	MMP2,MMP3
CXCL12	1.2	cytokine		1.575	0.0376	AKR1C3,BMP1,Ly6a (includes others),MMP14,MMP2,MMP3
capsaicin		chemical drug			0.0379	CAMK2A,MMP14,MMP2
IL12A	-1.1	cytokine			0.0379	CD86,MMP2,MMP3
KLF5	1	transcription regulator			0.0379	HIF1A,LAMA1,UCP2
SCAP	-1	other			0.0379	CYB5A,DHCR7,Gstm6
quercetin		chemical drug		-0.277	0.0381	ACPP,CYP1A1,CYP2E1,HIF1A,NF2
troglitazone		chemical drug		-1.126	0.0395	BMP1,CD86,COL1A2,CYP1A1,GADD45A,IFI16,IFRD1,MMP3,TRIB3,UCP2
MAP3K1	1.2	kinase			0.0398	COL3A1,MMP3,NOV
rotenone		chemical toxicant			0.0398	HIF1A,SLC16A1,UCP2
YBX1	1	transcription regulator			0.0398	COL1A2,MMP2,MMP3
MEF2C	1.1	transcription regulator		-1.961	0.0402	COL1A2,COL3A1,MYL4,POSTN
RORA	1.1	ligand-dependent nuclear receptor			0.0403	APOA4,ARSG,CYP2E1,DHCR24,GSTM4,UCP2
CX3CL1	1	cytokine			0.0406	HIF1A,MMP2
mitoxantrone		chemical drug			0.0406	COL1A2,HIF1A
MST1	-1.2	growth factor			0.0406	CTGF,SOX4
NAMPT	-1.2	cytokine			0.0406	MMP3,PEG10
vasoactive intestinal peptide		biologic drug			0.0406	MMP3,MYD88
Akt		group		0.781	0.041	ADM,COL3A1,CTGF,HIF1A,HIF3A,MMP14,MMP2
SEPT9	1.2	enzyme			0.0413	HIF1A
(Ala9)-autocamtide-2		chemical - kinase inhibitor			0.0413	MMP2
1,2,5,6-dibenzanthracene		chemical toxicant			0.0413	CYP1A1
10-decarbamoylmitomycin C		chemical toxicant			0.0413	GADD45A
1-heptanol		chemical reagent			0.0413	CD86
3-nitrobenzanthrone		chemical toxicant			0.0413	CYP1A1
4-vinylcyclohexene		chemical reagent			0.0413	CYP2E1
acetoacetic acid		chemical - endogenous mammalian			0.0413	CYP2E1
ADRA2A	1.1	g-protein coupled receptor			0.0413	CYP1A1
AKR1C3	2.9	enzyme			0.0413	PROS1
BB-2116		chemical - protease inhibitor			0.0413	MMP14
benzo(a)pyrene 7,8-dihydrodiol		chemical toxicant			0.0413	CYP1A1
CADPS	-1.1	other			0.0413	SCG2
CCG-1423		chemical reagent			0.0413	CTGF
cercosporin		chemical - endogenous non-mammalian			0.0413	CTGF
chloroform		chemical toxicant			0.0413	CYP2E1
corticotropin		biologic drug			0.0413	FURIN
cyclohexanecarboxylic acid		chemical reagent			0.0413	SYP
diosmin		chemical drug			0.0413	CYP1A1
DNM2	-1	enzyme			0.0413	MMP2
docosahexaenoic acid		chemical drug		0	0.0413	CD86,CTGF,MMP2,PLTP,UCP2
EAF2	-1.2	transcription regulator			0.0413	HIF1A
ELAVL3	-1.2	other			0.0413	GAP43
Fascin		group			0.0413	CTGF
Fetal Hemoglobin		complex			0.0413	HIF1A
fluoroquinolone		chemical drug			0.0413	MMP2
FREM2	1.2	other			0.0413	FREM1
galactosylceramide		chemical - endogenous mammalian			0.0413	CD86
glucuronyl glucosamine glycan sulfate		chemical drug			0.0413	COL3A1
indole		chemical - endogenous mammalian			0.0413	CYP1A1
Integrin alpha 3 beta 1		complex			0.0413	MMP2
Integrin alpha 4 beta 1		complex			0.0413	MMP14
KCNQ2	1.3	ion channel			0.0413	SYP
KLF16		other			0.0413	CYP1A1
kynurenine		chemical - endogenous mammalian			0.0413	MMP3
LAMA4	1	enzyme			0.0413	HIF1A
LDL-cholesterol		complex			0.0413	SYP
lisofylline		chemical drug			0.0413	LAMB1
mercaptopropionylglycine		chemical drug			0.0413	HIF1A
miR-346 (and other miRNAs w/seed GUCUGCC)		mature microrna			0.0413	EFEMP2
Mn2+		chemical - endogenous mammalian			0.0413	GAP43
MPO	1.1	enzyme			0.0413	EDNRB
nitromifene		chemical reagent			0.0413	SYP
NOLC1		transcription regulator			0.0413	Orm1 (includes others)
NPTX1	-1	other			0.0413	SYP
patulin		chemical toxicant			0.0413	CYP1A1
phenylacetic acid		chemical - endogenous mammalian			0.0413	MMP2
PHGDH	-1.2	enzyme			0.0413	MMP2
prochloraz		chemical reagent			0.0413	CYP1A1
propentofylline		chemical drug			0.0413	GAP43
pyridine		chemical - endogenous mammalian			0.0413	CYP2E1
SLC3A2	-1.1	transporter			0.0413	CTGF
taxifolin		chemical - endogenous non-mammalian			0.0413	CYP1A1
TCF20	1	transcription regulator			0.0413	MMP3
TMBIM1	-1	other			0.0413	MMP2
trimetazidine		chemical drug			0.0413	CTGF
tyrphostin AG 18		chemical - kinase inhibitor			0.0413	AKR1C3
zeaxanthin		chemical drug			0.0413	MMP2
ZSCAN10	-1.2	transcription regulator			0.0413	EIF1AX
IFNA1/IFNA13		cytokine			0.0416	CD86,CYP1A1,CYP2E1
romidepsin		biologic drug			0.0416	CD86,HIF1A,NF2
UCP1	-1.3	transporter		-1.4	0.0424	ATF5,EMB,GADD45A,TRIB3,UCP2
NGF	-1.1	growth factor		1.494	0.0431	CD86,GADD45A,GAP43,MMP2,MMP3,SCG2
CITED2	-1.4	transcription regulator			0.0439	HIF1A,PCGF2
ITGA1	-1.1	other			0.0439	MMP2,MMP3
thyroid hormone		chemical - endogenous mammalian		0	0.0441	ALDOB,APOA4,NNAT,SCG2,TTR,UCP2
PPIF	1.1	enzyme		1	0.0443	CITED2,MMP2,RGS3,Serpina3h
PTEN	-1	phosphatase		-1.161	0.0444	ADM,AKR1C3,BDKRB1,CITED2,EBP,HIF1A,IFRD1,MMP14,MMP2,MMP3,SOX4
ADIPOQ	-1.2	other			0.0447	COL3A1,CTGF,MMP3,SYP,UCP2
LY294002		chemical - kinase inhibitor	Inhibited	-2.011	0.0449	CD86,COL1A2,CTGF,CYP2E1,DHCR24,EIF1AX,HIF1A,MMP14,MMP2,POSTN,SCG2,SPRY1
hexachlorobenzene		chemical toxicant			0.0455	EFEMP2,GTPBP4,MMP2
RHO	-1	g-protein coupled receptor			0.0455	COL1A2,DPYSL3,PCOLCE
FSH		complex		0.359	0.0458	ACPP,ADM,ARHGAP1,CREBZF,CTGF,DHCR7,HSD11B1,MMP2,PLA1A,PPP1R2
ELF1	1	transcription regulator			0.0473	CDK11A,CITED2
everolimus		chemical drug			0.0473	CTGF,MMP2
kaempferol		chemical toxicant			0.0473	CYP1A1,MMP2
MALP-2s		chemical reagent			0.0473	CAST,CD86
NCOR-LXR-Oxysterol-RXR-9 cis RA		complex			0.0473	APOA4,PLTP
ochratoxin A		chemical toxicant			0.0473	COL3A1,GSTM5
oltipraz		chemical drug			0.0473	CYP1A1,GSTM5
Smad		complex			0.0473	COL1A2,CTGF
CpG ODN 1826		chemical reagent			0.0475	CD86,FCGR2B,MYD88
Immunoglobulin		complex		0.335	0.0478	ADM,CD86,CYP2E1,EXT1,Ly6a (includes others),MMP2,TNFSF15
clofibrate		chemical drug		-0.152	0.0487	CDS2,CYP1A1,GADD45A,UCP2
EIF2AK3	1	kinase			0.0487	ATF5,CTSC,GADD45A,UIMC1
Tnf (family)		group		1.067	0.0494	CD163,CD86,CYP1A1,HIF1A,HSD11B1
Calmodulin		group			0.0495	CORO6,LGI3,LINGO1
MYD88	1.2	other		1.969	0.0543	ACPP,ALDH1A1,CD86,EDNRB,HIF1A,MMP14,MMP2
P38 MAPK		group		1.799	0.056	CD86,COL3A1,CTGF,CYP1A1,EDNRB,HIF1A,MMP2,MMP3,POSTN
CHUK	-1.1	kinase	Activated	2.219	0.0649	CLDN23,IFI16,MMP2,MMP3,NOV,OVOL1
CD40	1.4	transmembrane receptor	Activated	2.352	0.0738	A4GALT,CD86,FCGR2B,Ly6a (includes others),MMP14,MMP3
Pam3-Cys-Ser-Lys4		chemical reagent		1.929	0.0818	CD86,FCGR2B,MMP2,MMP3
TP63	1.1	transcription regulator		-1.994	0.0943	ADM,ALDH1A3,ATG3,CAST,CITED2,FBN1,GADD45A,POSTN
CSF2	-1.2	cytokine	Activated	2.926	0.0973	CD86,CTSC,EFEMP2,FCGR2B,MMP14,MMP2,PDE1B,PLA2G15,STEAP3,TNFSF15
NUPR1	1.1	transcription regulator	Inhibited	-2.714	0.0987	ADM,CITED2,COL1A2,COL3A1,DHCR24,GADD45A,MYD88,NAAA,PFKFB4,PPWD1,TRIB3
IL21	-1	cytokine		1.893	0.101	CD86,FCGR2B,MMP2,MYD88
TNFRSF1A	1.1	transmembrane receptor		1.982	0.101	CD86,CTGF,MMP14,MMP2
calcitriol		chemical drug	Inhibited	-2.752	0.104	CES1,CYP1A1,FBN1,GADD45A,LRRC17,Ly6a (includes others),MYD88,RARRES1,SLC7A7,UCP2
lenalidomide		chemical drug	Activated	2	0.121	APTX,PLOD2,PPP2R1B,RTP4
IRF7	1.3	transcription regulator		1.982	0.195	IFI16,NRAP,RTP4,Trim30a/Trim30d
prostaglandin E2		chemical - endogenous mammalian	Activated	2.217	0.217	CD86,CTGF,HIF1A,MMP14,MMP2,UCP2
rosiglitazone		chemical drug		1.854	0.224	CD86,CTGF,HSD11B1,PLA2G15,PLTP,POSTN,PPP2R1B,UCP2
poly rI:rC-RNA		biologic drug	Activated	2.203	0.23	CD86,FCGR2B,IFI16,MMP2,MMP3,MYD88,Oas1d (includes others),Trim30a/Trim30d
IKBKB	1.1	kinase		1.987	0.275	GADD45A,HIF1A,IFI16,MMP2,MMP3
BMP2	-1.3	growth factor		1.969	0.281	COL1A2,DLX3,IFI16,POSTN
